# Supplementary material for: Hydrothermal synthesis and luminescent properties of a new family of organically templated lanthanide fluorides
Source: Royal Society of Chemistry journal article supplement (doi:10.1039/b707993a), 2007-01-01

## Hydrothermal synthesis and luminescent properties of a new family of organically-templated lanthanide fluorides

Anil C. A. Jayasundera<sup>1</sup>, Adrian A. Finch<sup>2</sup>, P. D. Townsend<sup>3</sup> and Philip Lightfoot<sup>1\*</sup>

1. EaStChem, School of Chemistry, University of St Andrews, St Andrews, Fife KY16 9ST, UK.

2. School of Geography and Geosciences, University of St Andrews, St Andrews, Fife KY16 9AL, UK.

3. School of Engineering and Design, University of Sussex, Brighton, BN1 9QH, UK.

### Supplementary Material

Figure S1: Rietveld refinement for  $[\text{C}_2\text{N}_2\text{H}_{10}]_{0.5}[\text{Lu}_2\text{F}_7]$

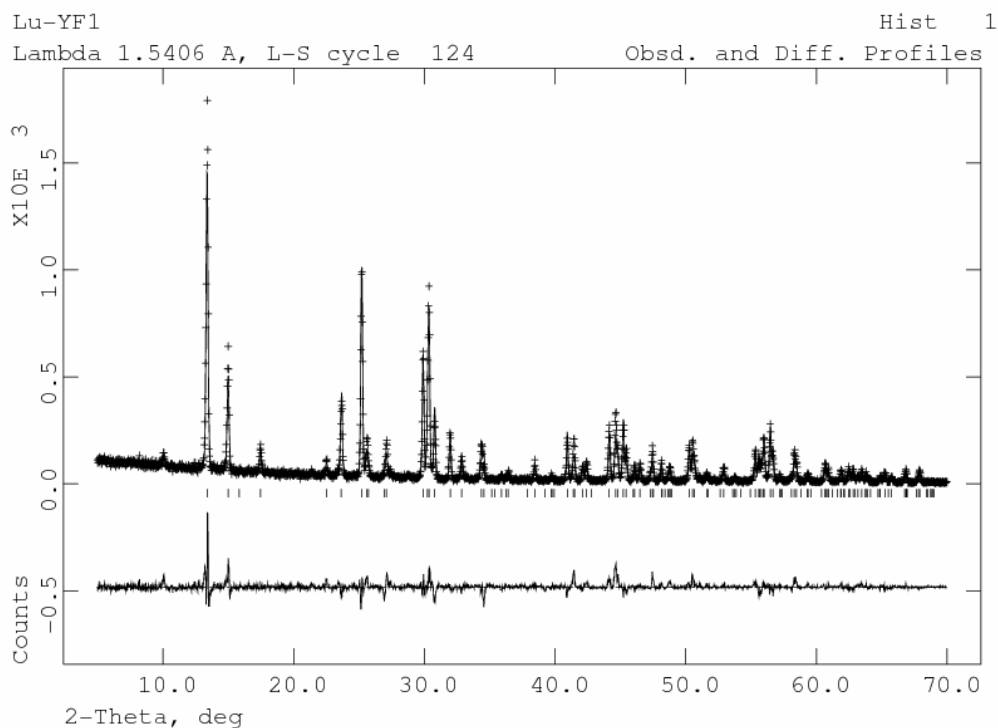

Figure S2: Rietveld refinement for  $[\text{C}_2\text{N}_2\text{H}_{10}]_{0.5}[\text{Er}_2\text{F}_7]$

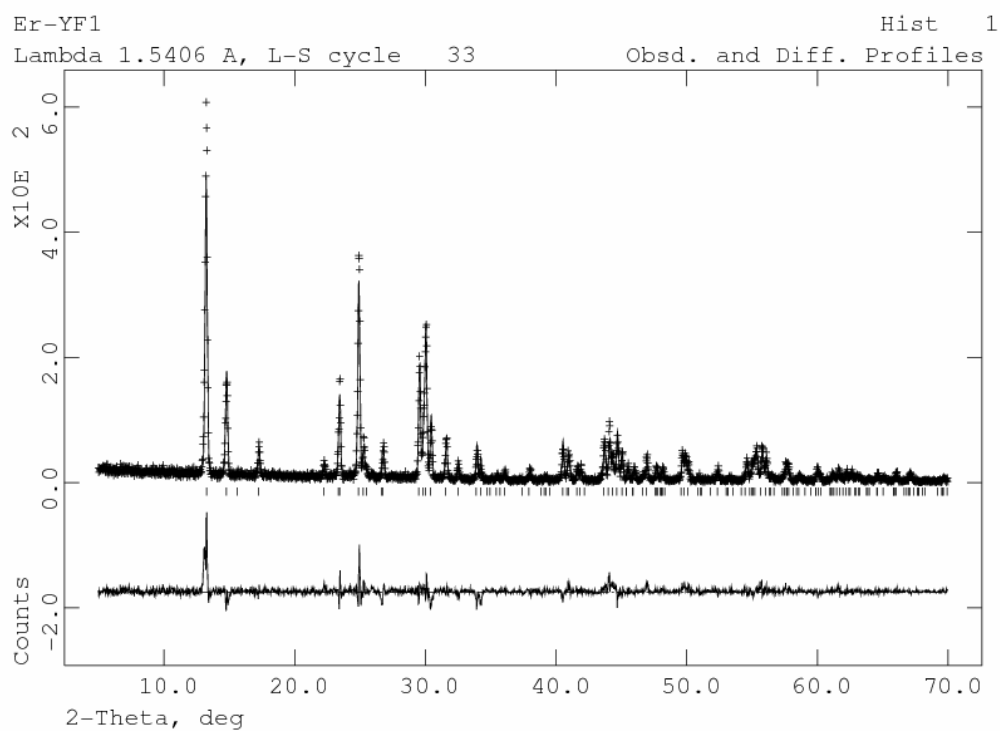

Supplement: b707993a.pdf [file b707993a.pdf]
